# Supplementary material for: Functional assessment of migration and adhesion to quantify cancer cell aggression
Source: Royal Society of Chemistry journal article supplement (doi:10.1039/d4sm01351d), 2025-01-01
Supplement: d4sm01351d2.pdf [file d4sm01351d2.pdf]

## **Supplementary Information**

### **Functional Assessment of Migration and Adhesion to Quantify Cancer Cell Aggression**

Lauren E. Mehanna<sup>a</sup>, James D. Boyd<sup>b</sup>, Chloe G. Walker<sup>a</sup>, Adrianna R. Osborne<sup>a</sup>, Martha E. Grady<sup>b\*</sup>, Brad J. Berron<sup>a\*</sup>

<sup>a</sup>Department of Chemical and Materials Engineering, University of Kentucky, Lexington, KY, USA

<sup>b</sup>Department of Mechanical and Aerospace Engineering, University of Kentucky, Lexington, KY, USA

\*Co-Corresponding Authors: Brad J. Berron and Martha E. Grady

\*Corresponding Author 1: Brad J. Berron

Email: brad.berron@uky.edu

Phone Number: (859) 257-2791

Permanent Address: 177 F. Paul Anderson Tower, Lexington, KY, 40506

\*Corresponding Author 2: Martha E. Grady

Email: m.grady@uky.edu

Phone Number: (859) 323-4107

Permanent Address: 151 Ralph G. Anderson Building, Lexington, KY, 40506

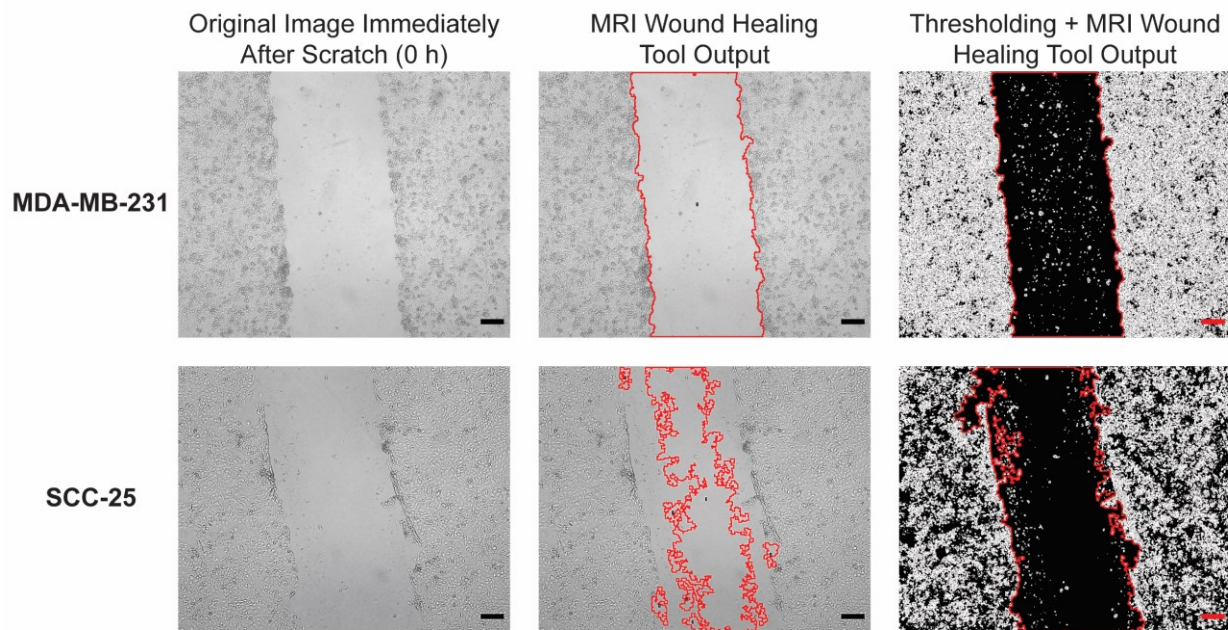

**S1 Fig. Wound Healing Assay Analysis Methods.** Example of the ImageJ output using the MRI Wound Healing Tool of the original image and the output of the MRI Wound Healing Tool when the image was thresholded. A comparison of these outputs was created for a cell line with good contrast (MDA-MB-231) versus poor contrast (SCC-25) between the cells and background. Scale bars represent 200 μm.

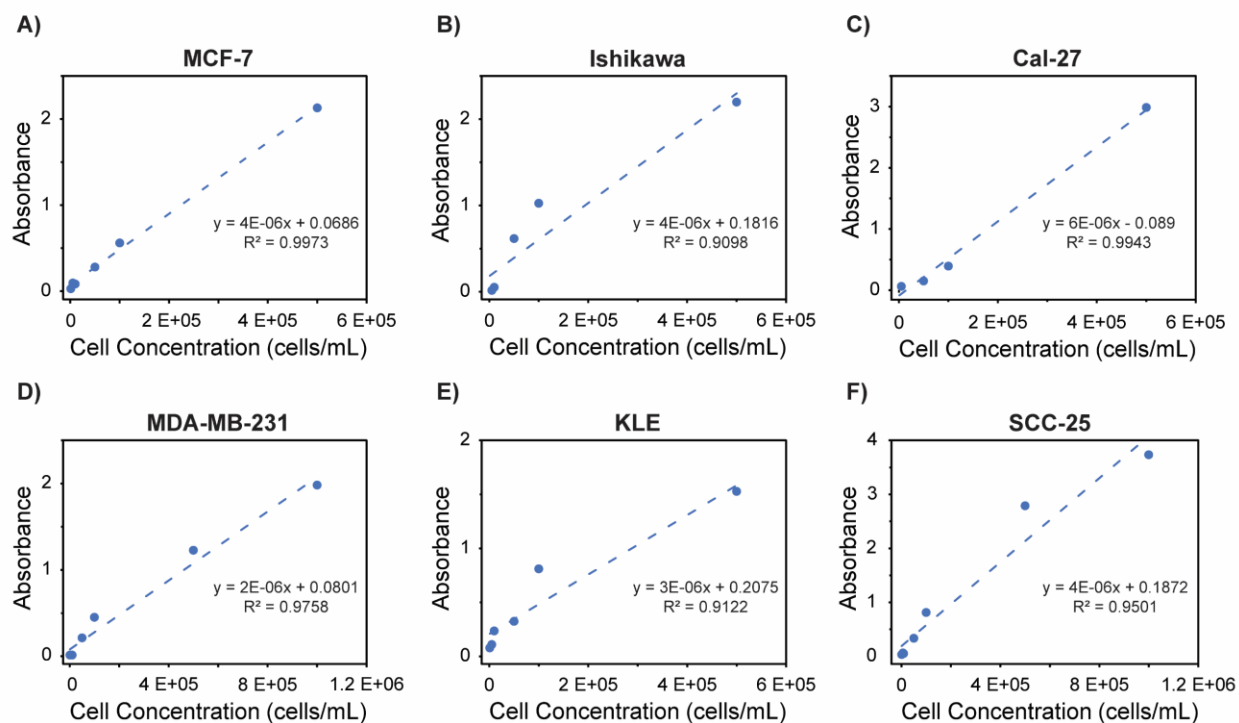

**S2 Fig. MTT Calibration Curves.** (A-F) Calibration curve relating cell concentration (cells/mL) to absorbance from MTT assay for each cell line.

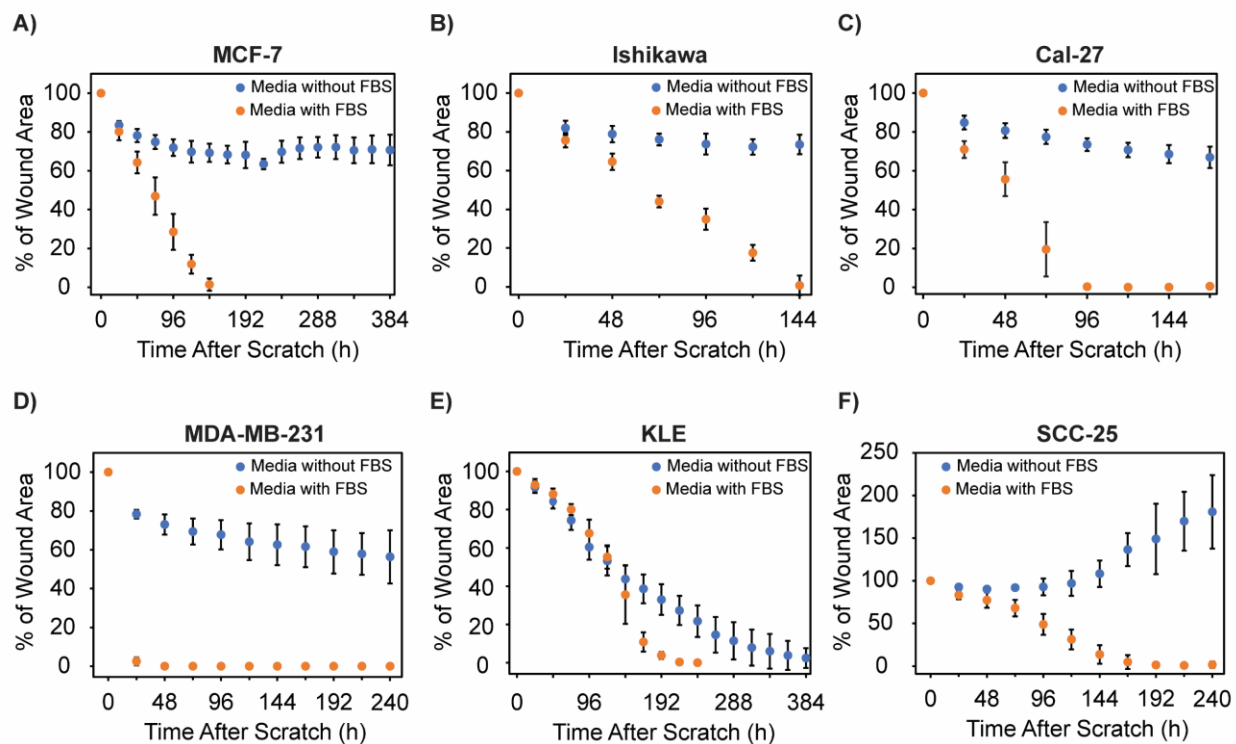

**S3 Fig. Extended Analysis of Wound Closure Study.** Extended timepoints of the percentage of wound area over time based on the wound being cultured in serum-containing or serum-free media.

**S1 Table. Wound Closure with Serum-free/Low Serum Comparison to Literature.** Summary of current literature of wound closure assays with serum-free or low-serum culture media for the six cell lines used in this work in comparison to observed data.

| Tissue of Origin | Wound Closure from Data (This Work)                                                                                                                                                                                                                                                                                                                                                                                            | Wound Closure from Literature                                                                                                                                                                                                                    |
|------------------|--------------------------------------------------------------------------------------------------------------------------------------------------------------------------------------------------------------------------------------------------------------------------------------------------------------------------------------------------------------------------------------------------------------------------------|--------------------------------------------------------------------------------------------------------------------------------------------------------------------------------------------------------------------------------------------------|
| Breast           | <ul style="list-style-type: none"> <li>MDA-MB-231 had significantly faster initial wound closure in first 12 h compared to MCF-7</li> <li>Neither cell lines fully closed the wound</li> <li>MCF-7 closed ~17% of the wound in 24 h and ~29% of the wound in 144 h</li> <li>MDA-MB-231 closed ~27% of the wound in 24 h and ~38% of the wound in 144 h</li> </ul>                                                              | <ul style="list-style-type: none"> <li>MDA-MB-231 had faster wound closure compared to MCF-7<sup>1</sup></li> <li>MDA-MB-231 closed ~40% of the wound in 24 h<sup>1</sup></li> <li>MCF-7 closed ~42% of the wound in 48 h<sup>1</sup></li> </ul> |
| Endometrium      | <ul style="list-style-type: none"> <li>Ishikawa had significantly faster initial wound closure in first 12 h compared to KLE</li> <li>Ishikawa did not fully close the wound</li> <li>Ishikawa closed ~18% of the wound in 24 h and ~26% of the wound in 144 h</li> <li>KLE closed ~10% of the wound in first 24 h and fully closed the wound within 384 h</li> </ul>                                                          | <ul style="list-style-type: none"> <li>In low-serum media, Ishikawa closed ~15% of the wound in 72 h<sup>2</sup></li> <li>Did not find appropriate KLE literature in low/serum-free conditions for comparison</li> </ul>                         |
| Tongue           | <ul style="list-style-type: none"> <li>Cal-27 had faster initial wound closure in first 12 h compared to SCC-25 (not significant)</li> <li>Neither cell lines fully closed the wound</li> <li>Cal-27 closed ~15% of the wound in 24 h and ~44% of the wound in 144 h</li> <li>SCC-25 closed ~7% of the wound in 24 h</li> <li>After 72 h, SCC-25 cells detached from surface, causing an increase in the wound area</li> </ul> | <ul style="list-style-type: none"> <li>Did not find appropriate literature in low/serum-free conditions for comparison</li> </ul>                                                                                                                |

**S2 Table. Wound Closure with Serum Comparison to Literature.** Summary of current literature of wound closure assays with serum containing culture media for the six cell lines used in this work in comparison to observed data.

| Tissue of Origin | Wound Closure from Data (This Work)                                                                                                                                                                                                                                                                                                                                                                                           | Wound Closure from Literature                                                                                                                                                                                                                                                                                                    |
|------------------|-------------------------------------------------------------------------------------------------------------------------------------------------------------------------------------------------------------------------------------------------------------------------------------------------------------------------------------------------------------------------------------------------------------------------------|----------------------------------------------------------------------------------------------------------------------------------------------------------------------------------------------------------------------------------------------------------------------------------------------------------------------------------|
| Breast           | <ul style="list-style-type: none"> <li>MDA-MB-231 had significantly faster initial wound closure in first 12 h compared to MCF-7</li> <li>MDA-MB-231 completely closed the wound and MCF-7 closed over 99% of wound in 144 h</li> <li>MCF-7 closed ~20% of the wound in 24 h and &gt;99% of the wound in 144 h</li> <li>MDA-MB-231 closed &gt;98% of the wound in 24 h and completely closed the wound within 48 h</li> </ul> | <ul style="list-style-type: none"> <li>MDA-MB-231 had faster wound closure compared to MCF-7</li> <li>MCF-7 closed ~23% of the wound in 24 h<sup>3</sup></li> <li>MDA-MB-231 closed ~68% of the wound in 24 h<sup>3</sup></li> <li>Additional studies show that MDA-MB-231 close the wound within 24 h<sup>4, 5</sup></li> </ul> |
| Endometrium      | <ul style="list-style-type: none"> <li>Ishikawa had significantly faster initial wound closure in first 12 h compared to KLE</li> <li>Ishikawa closed ~25% of the wound in 24 h and &gt;99% of the wound in 144 h</li> <li>KLE closed ~7% of the wound in 24 h and ~72% of the wound in 144 h</li> </ul>                                                                                                                      | <ul style="list-style-type: none"> <li>Ishikawa had ~40% of wound closure in 48 h<sup>6</sup></li> <li>KLE had ~30% wound closure in 30 h<sup>7</sup></li> </ul>                                                                                                                                                                 |
| Tongue           | <ul style="list-style-type: none"> <li>Cal-27 had faster initial wound closure in first 12 h compared to SCC-25 (not significant)</li> <li>Cal-27 closed ~30% of the wound in 24 h and completely closed the wound within 144 h</li> <li>SCC-25 closed ~17% of the wound in 24 h and ~87% of the wound in 144 h</li> </ul>                                                                                                    | <ul style="list-style-type: none"> <li>Cal-27 had faster wound closure compared to SCC-25</li> <li>Cal-27 closed ~25% of the wound in 24 h<sup>8</sup></li> <li>SCC-25 closed ~15% of the wound in 24 h<sup>8</sup></li> </ul>                                                                                                   |

**S3 Table. Cell Detachment Comparison to Literature.** Summary of current literature of E-cadherin and N-cadherin biomarker expression for the six cell lines used in this work in comparison to observed cell detachment data of individual cell populations.

| <b>Tissue of Origin</b> | <b>Individual Population Cell Detachment from Data (This Work)</b>                                                                                                                                                                   | <b>Relative E-Cadherin Expression from Literature</b>                                                                                               | <b>Relative N-Cadherin Expression from Literature</b>                                                                                               |
|-------------------------|--------------------------------------------------------------------------------------------------------------------------------------------------------------------------------------------------------------------------------------|-----------------------------------------------------------------------------------------------------------------------------------------------------|-----------------------------------------------------------------------------------------------------------------------------------------------------|
| Breast                  | <ul style="list-style-type: none"> <li>MDA-MB-231 had significantly greater cell detachment at each timepoint</li> </ul>                                                                                                             | <ul style="list-style-type: none"> <li>E-cadherin expression is high in MCF-7 and low in MDA-MB-231<sup>9-12</sup></li> </ul>                       | <ul style="list-style-type: none"> <li>N-cadherin expression is low to moderate in MCF-7 and high in in MDA-MB-231<sup>9-12</sup></li> </ul>        |
| Endometrium             | <ul style="list-style-type: none"> <li>KLE had greater detachment at each timepoint (not significant)</li> </ul>                                                                                                                     | <ul style="list-style-type: none"> <li>E-cadherin expression is high in Ishikawa and low in KLE<sup>6, 13-15</sup></li> </ul>                       | <ul style="list-style-type: none"> <li>N-cadherin expression is low in Ishikawa and high in KLE<sup>6, 13-15</sup></li> </ul>                       |
| Tongue                  | <ul style="list-style-type: none"> <li>SCC-25 had greater detachment at each timepoint (not significant)</li> <li>More similar cell detachment between SCC-25 and Cal-22 compared to cell lines from other tissue origins</li> </ul> | <ul style="list-style-type: none"> <li>E-cadherin expression is moderate to high in Cal-27 and low to moderate in SCC-25<sup>16-19</sup></li> </ul> | <ul style="list-style-type: none"> <li>N-cadherin expression is low to moderate in Cal-27 and moderate to high in SCC-25<sup>16-19</sup></li> </ul> |

**S4 Table. Significance Testing of Wound Closure Study.** Summary of significance testing using one-way ANOVA to determine significance between the 12 h wound closure average migration velocity of cell lines when cultured in media with the presence or absence of serum using JMP. Significance was determined as \*  $p < 0.05$ , \*\*  $p < 0.01$ , \*\*\*  $p < 0.001$ .

| Comparison                                        | P-Value | Significant? |
|---------------------------------------------------|---------|--------------|
| Cell Lines without Serum – Migration Velocity     | <0.001  | Yes          |
| Cell Line with Serum – Migration Velocity         | <0.001  | Yes          |
| Interaction Between Presence of Serum – Cell Line | <0.001  | Yes          |



**S5 Table. Significance Testing of Wound Closure Study using Post-Hoc Testing.** Summary of adjusted p-values using Tukey-Kramer HSD for multiple comparisons in JMP. Significance was determined as \*  $p < 0.05$ , \*\*  $p < 0.01$ , \*\*\*  $p < 0.001$ .

| Cell Type 1 | Cell Type 2 | Variable                                               | P-Value |
|-------------|-------------|--------------------------------------------------------|---------|
| MCF-7       | MDA-MB-231  | Average Migration Velocity Without Serum               | 6E-04   |
| Ishikawa    | KLE         | Average Migration Velocity Without Serum               | 5E-04   |
| Cal-27      | SCC-25      | Average Migration Velocity Without Serum               | 0.74    |
| MCF-7       | MDA-MB-231  | Average Migration Velocity With Serum                  | <1E-4   |
| Ishikawa    | KLE         | Average Migration Velocity With Serum                  | 1.2E-03 |
| Cal-27      | SCC-25      | Average Migration Velocity With Serum                  | 1.0     |
| MCF-7       | MCF-7       | Average Migration Velocity With Serum vs Without Serum | 0.79    |
| MDA-MB-231  | MDA-MB-231  | Average Migration Velocity With Serum vs Without Serum | <1E-4   |
| Ishikawa    | Ishikawa    | Average Migration Velocity With Serum vs Without Serum | 0.63    |
| KLE         | KLE         | Average Migration Velocity With Serum vs Without Serum | 1.0     |
| Cal-27      | Cal-27      | Average Migration Velocity With Serum vs Without Serum | 0.26    |
| SCC-25      | SCC-25      | Average Migration Velocity With Serum vs Without Serum | 0.088   |

**S6 Table. Summary of Wound Closure Migration Velocity.** Summary of the average wound closure migration velocity in the first 12 h after the wound was created and standard deviation of each cell line in serum-containing or serum-free media.

| Cell Type  | Serum Present | Average Migration Velocity ( $\mu\text{m/h}$ ) | St. Dev. |
|------------|---------------|------------------------------------------------|----------|
| MCF-7      | Yes           | 2.34                                           | 1.82     |
| Ishikawa   | Yes           | 6.45                                           | 1.36     |
| Cal-27     | Yes           | 4.75                                           | 1.21     |
| MDA-MB-231 | Yes           | 21.8                                           | 1.93     |
| KLE        | Yes           | 1.53                                           | 1.11     |
| SCC-25     | Yes           | 4.54                                           | 2.24     |
| MCF-7      | No            | 3.87                                           | 0.27     |
| Ishikawa   | No            | 4.50                                           | 1.10     |
| Cal-27     | No            | 2.70                                           | 0.83     |
| MDA-MB-231 | No            | 6.86                                           | 1.47     |
| KLE        | No            | 1.47                                           | 0.73     |
| SCC-25     | No            | 1.87                                           | 0.91     |

**S7 Table. Summary of Cell Population Doubling Time.** Summary of the average population doubling time and standard deviation of each cell line determined from the MTT assay.

| <b>Cell Type</b> | <b>Average Population Doubling Time (h)</b> | <b>St. Dev.</b> |
|------------------|---------------------------------------------|-----------------|
| MCF-7            | 59.6                                        | 14.6            |
| Ishikawa         | 31.8                                        | 2.22            |
| Cal-27           | 33.5                                        | 4.69            |
| MDA-MB-231       | 28.0                                        | 3.07            |
| KLE              | 33.4                                        | 1.06            |
| SCC-25           | 40.4                                        | 7.11            |

**S8 Table. Significance Testing of Cell Adhesion of Individual Cell Populations.** Summary of significance testing using an independent two-group Student's t-test between cell lines for the percentage of cells retained after exposure to 50 mL/min shear flow for 15 s, 30 s, 45 s, and 60 s. Significance was determined as \*  $p < 0.05$ , \*\*  $p < 0.01$ , \*\*\*  $p < 0.001$ .

| Cell Type 1 | Cell Type 2 | Variable                 | P-Value |
|-------------|-------------|--------------------------|---------|
| MCF-7       | MDA-MB-231  | % Cell Retention at 15 s | 5.3E-03 |
| MCF-7       | MDA-MB-231  | % Cell Retention at 30 s | 0.015   |
| MCF-7       | MDA-MB-231  | % Cell Retention at 45 s | 0.021   |
| MCF-7       | MDA-MB-231  | % Cell Retention at 60 s | 0.023   |
| Ishikawa    | KLE         | % Cell Retention at 15 s | 0.16    |
| Ishikawa    | KLE         | % Cell Retention at 30 s | 0.12    |
| Ishikawa    | KLE         | % Cell Retention at 45 s | 0.13    |
| Ishikawa    | KLE         | % Cell Retention at 60 s | 0.11    |
| Cal-27      | SCC-25      | % Cell Retention at 15 s | 0.53    |
| Cal-27      | SCC-25      | % Cell Retention at 30 s | 0.73    |
| Cal-27      | SCC-25      | % Cell Retention at 45 s | 0.32    |
| Cal-27      | SCC-25      | % Cell Retention at 60 s | 0.35    |

**S9 Table. Significance Testing of Cell Adhesion of Co-Cultures.** Summary of significance testing using an independent two-group

Student's t-test between cell lines in co-culture for the percentage of cells retained after exposure to 50 mL/min shear flow for 60 s.

Significance was determined as \*  $p < 0.05$ , \*\*  $p < 0.01$ , \*\*\*  $p < 0.001$ .

| Cell Type 1 | Cell Type 2 | Variable                 | P-Value |
|-------------|-------------|--------------------------|---------|
| MCF-7       | MDA-MB-231  | % Cell Retention at 60 s | 8.3E-03 |
| Ishikawa    | KLE         | % Cell Retention at 60 s | 0.96    |
| Cal-27      | SCC-25      | % Cell Retention at 60 s | 0.72    |

**S10 Table. Significance Testing of Cell Adhesion of each Cell Line Cultured as Homogenous Populations versus in Co-Culture using Post-Hoc Testing.** Significance testing was performed using one-way ANOVA to determine differences between the percentage of cells retained after exposure to 50 mL/min shear flow for 60 s between culture conditions. Post-hoc testing using Tukey-Kramer HSD was used to adjust the p-values for multiple comparisons in JMP. Significance was determined as \*  $p < 0.05$ , \*\*  $p < 0.01$ , \*\*\*  $p < 0.001$ .

| Homogenous Population | Co-Culture | Variable                 | P-Value |
|-----------------------|------------|--------------------------|---------|
| MCF-7                 | MCF-7      | % Cell Retention at 60 s | <1E-4   |
| MDA-MB-231            | MDA-MB-231 | % Cell Retention at 60 s | 1E-4    |
| Ishikawa              | Ishikawa   | % Cell Retention at 60 s | 0.5857  |
| KLE                   | KLE        | % Cell Retention at 60 s | 0.9921  |
| Cal-27                | Cal-27     | % Cell Retention at 60 s | 0.8057  |
| SCC-25                | SCC-25     | % Cell Retention at 60 s | 0.9616  |

## References

1. H. Jia, X. Wang, W. Liu, X. Qin, B. Hu, Q. Ma, C. Lv and J. Lu, *Journal of Ethnopharmacology*, 2021, **277**, 114057.
2. K. Benjamin, C. M. Marquez, M. Morta, E. M. Reyes, L. Aragones and M. Velarde, *Journal of the ASEAN Federation of Endocrine Societies*, 2022, **38**, 13.
3. T. Li, C. Zhang, Y. Ding, W. Zhai, K. Liu, F. Bu, T. Tu, L. Sun, W. Zhu and F. Zhou, *Oncology reports*, 2015, **34**, 1469-1477.
4. N. A. Razak, N. Abu, W. Y. Ho, N. R. Zamberi, S. W. Tan, N. B. Alitheen, K. Long and S. K. Yeap, *Scientific reports*, 2019, **9**, 1514.
5. F. M. AlGhalban, A. A. Khan and M. N. K. Khattak, *Saudi Journal of Biological Sciences*, 2021, **28**, 3225-3234.
6. H.-Y. Chen, Y.-F. Chiang, J.-S. Huang, T.-C. Huang, Y.-H. Shih, K.-L. Wang, M. Ali, Y.-H. Hong, T.-M. Shieh and S.-M. Hsia, *Cancers*, 2021, **13**, 1236.
7. J. Girouard, M.-J. Lafleur, S. Parent, V. Leblanc and E. Asselin, *Gynecologic oncology*, 2013, **128**, 335-343.
8. X. Pang, H.-y. Fan, Y.-l. Tang, S.-s. Wang, M.-x. Cao, H.-f. Wang, L.-l. Dai, K. Wang, X.-h. Yu and J.-b. Wu, *PLoS One*, 2020, **15**, e0229089.
9. X. Wan, J. Hou, S. Liu, Y. Zhang, W. Li, Y. Zhang and Y. Ding, *Frontiers in Cell and Developmental Biology*, 2021, **9**, 583572.
10. X. Zhang, Z. Gao, K. Chen, Q. Zhuo, M. Chen, J. Wang, X. Lai and L. Wang, *Food & Function*, 2022, **13**, 4967-4976.
11. Z. Colín-Val, N. E. López-Díazguerrero and R. López-Marure, *The Journal of Steroid Biochemistry and Molecular Biology*, 2021, **208**, 105818.
12. A. H. Klopp, L. Lacerda, A. Gupta, B. G. Debeb, T. Solley, L. Li, E. Spaeth, W. Xu, X. Zhang and M. T. Lewis, *PloS one*, 2010, **5**, e12180.
13. W.-N. Yang, Z.-H. Ai, J. Wang, Y.-L. Xu and Y.-C. Teng, *Journal of gynecologic oncology*, 2014, **25**, 36-42.
14. S. Sheng, W. Liu, Y. Xue, Z. Pan, L. Zhao, F. Wang and X. Qi, *International Journal of Environmental Research and Public Health*, 2022, **19**, 15344.
15. X. Luan, C. Ma, P. Wang and F. Lou, *OncoTargets and therapy*, 2017, 1389-1402.
16. B. F. Matte, A. Kumar, J. K. Placone, V. G. Zanella, M. D. Martins, A. J. Engler and M. L. Lamers, *Journal of cell science*, 2019, **132**, jcs224360.
17. S. Y. Moon, P. S. de Campos, B. F. Matte, J. K. Placone, V. I. G. Zanella, M. D. Martins, M. L. Lamers and A. J. Engler, *Molecular Biology of the Cell*, 2023, **34**, ar89.
18. S. Wang, H. Fan and J. Bai, *Journal of Cellular and Molecular Medicine*, 2025, **29**, e70342.
19. X. Liu, L. Meng, X. Li, D. Li, Q. Liu, Y. Chen, X. Li, W. Bu and H. Sun, *International Journal of Oral Science*, 2020, **12**, 1-11.
